# Supplementary material for: Genome Near-Haploidization in CDC73-Wildtype Parathyroid Tumors
Source: Research Square preprint supplement (doi:10.21203/rs.3.rs-7834367/v1), 2025-10-20
Supplement: Supplementary file 1 [file 8c601019e047c9f6cfed6cda.docx]

| **Supplemental Table 1.** All available studies of chromosomal alterations in parathyroid lesions. Tables in the text included only genome-wide approach utilizing CGH, WES, WGS or SNP-arrays. | | | |
| --- | --- | --- | --- |
| **Hyperplasia** | | | |
| **Study** | **Method** | **Patients** | **Findings** |
| Farnebo et al. [1] | Several loci of chr. 11, Southern blot hybridization, PCR | 39 glands from 13 patients with SHPT | Monosomy for chromosome 11 in one tumor. |
| Chudek et al. [2] | 24 highly PMSM. XCI analysis. | 71 lesions from 24 patients. SHPT or THPT. Nodular hyperplasia (n=67), diffuse hyperplasia (n=4). | LOH across chr. 1, 3, 6, 11, 12, 13 and X in 10 of 67 nodules (15%). No LOH in diffuse hyperplasia. Monoclonal pattern in 58% of hyperplastic nodules in females. |
| Koshiishi et al. [3] | MSM on chr. 1, 2, 3, 5, 6, 11, 13, and 17 | 6 lesions from patients with primary hyperplasia and 47 lesions from 16 SHPT patients | LOH in 3 of 6 PHPT and 7 of 47 SHPT lesions, mostly on a single locus of chromosome 11. MSI: in 5 PHPT and in 9 SHPT lesions. MSI on TP53 was observed in 3 of 6 PHPT lesions and in 2 of 47 SHPT lesions. |
| Nagy et al. [4] | Microsatellite allelotyping. XCI analysis. | 69 hyperplastic lesions from 23 patients with refractory uremic hyperparathyroidism (12 female, 11 males)  Nodular (n=67)  Diffuse (n=2) – two different female patients | Diffuse hyperplasia: chr. 2q, 7p, 16q, 17q and 19q; no other lesions for the patient. Another patient with diffuse hyperplasia: polyclonal, other lesions from the patient: nodular and monoclonal, no chromosomal alterations. Glands of 4/12 females negative for chromosomal alterations, while in male 1/11 negative. In females with nodular hyperplasia, alterations were not observed on chr. 2, 3, 4, 5, 8, 9,10, 13, 15, 17, and 21.The most frequently altered were chr.20 and 7. In males alterations were not observed only on chr.6, 9, 10 and 15, while chr.18, 7, 2 and 21 were the most frequently altered. In total, allelic changes at least at one chromosomal arm in 31 of the 69 lesions (43%). 18/29 nodules in females were monoclonal. Loss of the chr. Y was seen in 8 of the 39 nodules in males. |
| Imanishi et al. [5] | CGH and genome-wide allelotyping | 46 tumors from 28 uremic patients with refractory SHPT or THPT. | Eleven tumors (24%) demonstrated clonal chromosomal imbalances. Chromosomal gains were more commonly observed than chromosomal losses.  Repeatedly observed gain on chr. 7 (4/46), 12 (5/46), and a loss on chr. 21 (2/46).  Gains on chr. 1q, 2, 6q, 9p, 9q, 18, 22, and X and losses on chr.11, 13q, and 22 in 1/46 (each). |
| Afonso et al. [6] Full text not available. | CGH | Primary and secondary hyperplasia | Large number of chromosomal alterations in SHPT. Some of these alterations had been previously reported for PHPT, but the majority were located in different regions or in different proportions. |
| Hunt et al. [7] | 22 markers on tumor suppressor genes | 5 SHPT | LOH was found in all specimens. 1x LOH *FHIT* and *MET.* 1x LOH *KAI1, HRAS* and *P53.* 1x LOH *p21* and *PTEN.* 1x *LOH APC*. 1x LOH *p21* and *p53.* |
| Yi et al. [8] | CGH, FISH, and TMA | 8 of nonfamilial hyperplasia | Genomic changes in PHPT were for the most part restricted to 11q13 deletion or loss of chromosome 11. In SHPT 11q23 deletion was common along with relatively strong CCND1 expression. |
| Dwight et al. [9] . | CGH, LOH and *MEN1* mutation analysis | 12 lithium-associated parathyroid tumors (LAPT) from 9 patients | Loss at 1p, 11, 15q, 22q and gain of the X chromosome (4/12). LOH at 11q13 and a somatic *MEN1* mutation (c.1193insTAC) in 1. Fewer genetic alterations than in the sporadic tumors, but the detected changes were similar with both familial and sporadic tumorigenesis. Higher prevalence of multiglandular disease in comparison with idiopathic sporadic patients. |
| Szabo et al. [10] | 139 MSM genome wide. | 9 glands from 8 family members with mutation in CaR. Chief cell hyperplasia. Nodular (n=2). 2 glands from 1 patient – 1 diffuse and 1 with dominant nodule. | All glands displayed allelic loss on at least one chromosomal arm (range 1–7).  Most loci corresponded to findings in sporadic parathyroid tumors, but the unique variant of familial hypercalcemia also exhibited frequent LOH on 12q (67%) and 7q (44%). LOH could not be detected at 3q, where the CaR gene is located. |
| Carling et al. [11] | 9 PMSM at chr. 1p (*RIZ1*) | 8 patients with nonfamiliar hyperplasia, chief cell (n = 7), water-clear (n = 1) types. | LOH at the *RIZ1* locus in 2 lesions |
| Falchetti et al. [12] | RFLP analysis and microsatellite analysis for LOH in the *MEN1* | 13 parathyroid glands from the five MEN1 patients | Similar allelic losses in homozygous and heterozygous patients. Allelic losses at 11q13 in multinodular glands, in moderately enlarged glands with a diffuse pattern of hyperplasia, and in a slightly enlarged gland with subtle histological changes suggestive of hyperplasia. All three glands from a heterozygous patient showed allelic losses at three 11q12–13 region loci, whereas the DNA between these two regions retained both alleles. |
| **PA** | | | |
| **Study** | **Method** | **n** | **Findings** |
| Arnold et al. [13] | RFLP | 1 | Clonal loss of chromosome 11. No LOH were found on chr. 1, 5, 6, 7, and 12. No DNA loss on X chromosome. |
| Thompson et al. [14] | 16 highly PMSM on chr. 3 CaR locus | 35 | LOH for markers tightly linked with and flanking the CaR locus (2/35). Deletion of 41,7 centimorgans (1/35). LOH spanning most of chr. 3 (1/35). |
| Pearce et al. [15] | PMSM at *RB1* and *BRCA2* | 16 | No alterations. |
| Tahara et al. [16] – full text not available. | 71 PMSM on all chromosomes | 25 | LOH on 6q (30%), 11p (27%), and 15q (35%), in addition to previously reported 1p (30%) and 11q (38%) allelic losses. All tumors with 11p loss had patterns consistent with monosomy for chromosome 11. |
| Agarwal et al. [17] | CGH | 10 | Deletions on chr. 11, 17 (n=5), and 22 (n=7). Complex pattern, predominance of losses. Every chr. was involved except chr. 8. |
| Palanisamy et al. [18] | CGH | 53 | Recurrent gains: chr. 16p (6/53) and 19p (5/53). Frequent losses chr. 11p (14/53), 11q (18/53), chr. 1p, 1q, 6q, 9p, 9q, 13q, and 15q (8–19%). |
| Koshiishi et al. [3] – full text not available. | 17 MSM on chr. 1, 2, 3, 5, 6, 11, 13, and 17 | 14 | LOH in 4 of 14 PA in most cases on a single locus of chromosome 11.  MSI was observed in six PA and seemed to cluster in the region of chromosome 11. |
| Farnebo et al. [19] | CGH and subsequent *MEN1* analysis | 26 sporadic, 10 cases previously given irradiation to the neck, and 8 familial cases | Sporadic: minimal regions of loss on chr. 11 (38%), 15q (27%), and 1p (19%); gains of chr.19p (15%) and 7 (12%). Irradiation-associated: frequent losses of chr.11q (50%), *MEN1* mutations in 4 of 8 cases (50%). Losses of chr. 1p (50%), 11q (50%), 11p (40%), 6q (30%), 18q (30%), and 22q (30%); gain of chr. 19p (30%). Familial: few alterations, gain of chr. 19p as single aberration in 3 tumors. 10/14 PA with involvement of the *MEN1* gene locus displayed loss of the entire chr. 11. Loss of chr. 15q in 5 PA. |
| Dwight et al. [20] | 22 MSM on 11q13, 1q21-q32 and 1p. | 33 | LOH - in 13 of 33 (39%) cases at 11q13, 6 of 33 (18%) at 1p, and in 3 of 33 (9%) cases at 1q (in conjunction with 1p loss). LOH at both chr. 1 and chr.11 in 1 tumor. |
| Haven et al. [21] | CGH | 4 adenomas from obligate CDC73 mut carriers | No LOH at chr. 1q21–32 in any of the parathyroid adenomas studied.  One adenoma with gain of chr. 16 and loss of chr. 13. Another with gain of chr. 1q and 17p. |
| Shan et al. [22] | 5 MSM at 1p36. | 32 | Frequency of LOH (7.1-41.2%) among the different markers. |
| Välimäki et al. [23] – full text not available. | Deletions of 1p and 11q13 | Total 42 tumors, adenomas and carcinomas. | Overall 1p LOH was detected in 18 of the 42 tumors analyzed (43%).  25/42 tumors (60%) showed alteration of either 1p, of the *MEN1* locus, or both. Tumors with LOH at 11q13 had a significantly higher weight than tumors with 1p LOH. |
| Villablanca et al. [24] | 17 PMSM at chr. 1q, and additional markers from 1p and 11q13 | 30 patients with sporadic cystic PA | LOH: 6/30 1q, 6/30 1p and 5/30 on 11q13.  Association between LOH at 1q and higher tumor weight (P= 0·0432). Association between 1q LOH and high pre operative serum PTH levels (P= 0·0357). No significant correlation between LOH and the sex, age and total serum Ca. |
| Dwight et al. [25] | CGH, LOH | 10 PA from 5 patients with sporadic multiglandular PHPT | Tumors of one patient had no alterations (3/10). 10 PA with chromosomal alteration. Different changes among PA of the same patient, seen in 2 patients. Another two patients with alterations only in one PA of two. Imbalances observed once: gains of chr. 5, 6, 7, 12, 16, 19p; losses of chr. losses 1p,15q, 18, 21q, 22q. Imbalances with losses observed twice: chr. 11, 12q, 13q. LOH observed at chr.11q13 (3/10) and 1p (1/10). |
| Garcia et al. [26] | CGH | 14 sporadic conventional PAs | Chromosomal gains (14/14), losses (3/14). No genomic amplification was observed. One patient with whole chromosome gains of chr. 1, 6p, 7, 8, 9, 10, 12, 16, and whole chr. losses on 11, 12, 13q, 19p. 13/14 PA exhibited >2 abnormalities. Imbalances with gain were observed once (chr. 2p, 3p, 7p, 7q, 8p, 10p, 15q, 16q, 19p, 21q, 22q), twice (1p, 2q, 5q, 6p, 10q, 12q, 17q, 19q), three times (1q, 3q, 6q, 9p, 9q, 13q, 14q, 18q, 20q) or five times (chr. 4q and Xq). Whole chr. gain was observed once (chr. 1, 4, 7, 10, 12, 16 and X) and three times (chr.8 and 9). Imbalances with losses observed once (chr. 6, 9pq, 13q, 15q, 18q, 19p, 20p) and three times (chr. 11q). Whole chr. loss was observed once on chr.20 and twice on. chr 11. No alterations detected on chr. 5p, 12p, 14p, 15p, 17p, 18p, 21p, 22p and Y. |
| Shattuck et al. [27] | 15 PMSM in the region of *SMAD3* | 67 | 24% showed loss. No acquired clonal mutations, insertions, or microdeletions in *SMAD3*. |
| Carling et al. [11] | 9 PMSM 1p (*RIZ1*) | 38 | LOH at the *RIZ1* locus (7/38) |
| Cetani et al. [28] | PMSM at the *Rb1* and *BRCA2* loci from each patient's paired tumor and leucocyte DNA samples. | 53 sporadic | 15 PA (28.8%) showed LOH at *Rb1*. For *BRCA2*, 46 tumor-leucocyte pairs were informative and LOH was present in eight (17.4%). |
| Hunt et al. [7] | 22 markers on tumor suppressor genes | 10 | LOH was found in all specimens: *p21* (7/10), *HPRT* (1/10), *VHL* (1/10), *MET* (2/10), *PTEN* (1/10), *P53* (2/10). |
| Yi et al. [8] | aCGH, FISH and TMAs to investigate chr.11 | 7 Type I  9 Type II | Common finding was deletion of the *MEN1* locus or loss of a large portion or an entire chr. 11. Loss of 11q23 was present in slightly less than 50%. The least common finding: translocation of the CCND1 gene. |
| Yip et al. [29] | 20 MSM on 12 tumor suppressor gene loci | 9 | LOH on 1p35.2-36.2 and *PTEN* (n=2 each); *P16*, *HRAS*, *KAI1*, *MEN1*, *P53* and *NF2* (n=1 each). No LOH detected on *HPRT2*, *RB*, *VHL* and *APC*. |
| Newey et al. [30] | WES | 16 | LOH 11 (8/16), LOH 1, 15 and 18 (3/16), LOH 22 (4/16), LOH 13 and 21 (2/16), LOH 2, 3, 4, 5, 7, 8, 9, 10, 17, 19 and X (1/16). Not affected by LOH: 5, 12, 14, 16 and 20. |
| Cromer et al. [31] | WES | 8 | 4/8 tumors displayed a frame shift deletion or nonsense mutation in MEN1, accompanied by LOH of the other allele. LOH also seen once on chr. 1p, 9, 13, 21, 22. No LOH in 3/8. |
| Sulaiman et al. [32] | a-CGH and SNP microarrays | 5, established *CDC73* inactivating mutation | No significant alterations in 1/5. Deletion of whole chr. 9 (1/5). Gain of entire chr 16 (n=2), with gain of entire chr. 17 or 22. No significant aberrations on chr. 1, 11 or 13. Different loss pattern than unselected tumors. The least extent of CNAs compared to APT and Ca. |
| Pardi et al. [33] | Sanger sequencing and MLPA assay of *AIP* and *MEN1*; LOH analysis by MS analysis. | 132 single adenomas of consecutive patients | Missense *AIP* mutations were found in 2/132 samples. MLPA (n=113) showed 35%-50% peak height reduction in *AIP* and *MEN1* in 29 tumors, including 1 with an *AIP* mutation. LOH at the *AIP* locus was detected in 29 tumors, overlapping with LOH at the *MEN1* locus in 29/37 cases. *MEN1* sequencing in these 37 tumors revealed mutations in 22 samples. |
| Borsari et al. [34] | Sanger sequencing and MLPA assay of *CDKN1B* and *MEN1*. | 147 | Three *CDKN1B* variants were found in 3/147 tumors, with 2/3 also harboring *MEN1* mutations. MLPA revealed no *CDKN1B* large deletions. Among 50 *CDKN1B* mutation-negative tumors, somatic *MEN1* mutations were identified in 15, and allelic loss at 11q13 occurred in all but one mutated adenoma. No *MEN1* large deletions were detected. |
| Brewer et al. [35] | Sanger sequencing and LOH analysis by MS analysis. | 82 | LOH at the *PRKN* locus (6q) in 8/82. No LOH at *FBXO4* (5p). |
| **APT** | | | |
| **Study** | **Method** | **n** | **Findings** |
| Pearce et al. [15] | PMSM at *RB1* and *BRCA2* | 3 | 2/3 LOH *BRCA2* (1/3 not available), 3/3 LOH *RB1*. |
| Cetani et al. [36] | PMSM at *HPRT2* | 4 *HPRT2*-wildtype tumors | No LOH at *HPRT2* was observed. |
| Sulaiman et al. [32] | a-CGH and SNP microarrays | 1, established *CDC73* inactivating mutation | Extensive aberrations affecting almost all chromosomes, large scale gains on 1p, 16, 17, 19, 20 and 22 and loss at 1p. No loss of *CDC73*. |
| McCoy et al. [37] | 20 MSM on 12 tumor suppressor genes. | 38 | LOH ≥1 locus was observed in 25/38. LOH was found at the *P21* locus in 9 cases, at *CDC73* in 6 cases, at *PTEN* in 6 (24%), at *RB1* in 4, and in lesser frequency at other loci. Six APA cases demonstrated LOH at multiple loci. |
| Jha et al. [38] | WES and FLCN germline sequencing | 3 | 1/3 with FLCN c.1285insC variant, no clear LOH was observed in the tumor, possibly due to normal DNA contamination. |
| **Carcinoma** | | | |
| **Study** | **Method** | **Patients** | **Findings** |
| Pearce et al. [15] | PMSM at *RB1* and *BRCA2* | 1 | LOH *BRCA2* and *RB1* |
| Agarwal et al. [17] | CGH | 10 | Frequent losses on chr. 1p (4/10) and chr. 17 (3/10), and gains were on chr.5 (3/10). Chr. 2, 9, 10, and 21 were not altered. |
| Haven et al. [21] | CGH | 1, *CDC73* mut carrier | LOH on chr.1q |
| Kytola et al. [39] | CGH | 29 | Losses of 1p and 13q (>40%), 9p (28%), 6q (24%), and 4q (21%). Gains: 19p (45%), Xq (28%), 9q (24%), 1q (21%) and 16p (21%). A sex-dependent distribution for two common alterations with gain of 1q in females and of Xq in males. |
| Välimäki et al. [23] – full text not available. | Deletions of 1p and 11q13 | Total 42 tumors, adenomas and carcinomas. | LOH in primary sporadic parathyroid adenomas occur frequently on the distal part of chromosome 1p and are thus clearly different from parathyroid carcinomas where the deletions are more proximally located. |
| Haven et al. [40] | 7 MSM in the *CDC73*  3 MSM in the *MEN1* | 22 and metastases | LOH 1q (12/22), 11q (11/22). The LOH pattern was identical in different regions of primary tumours or in comparison with metastases. LOH of both chr.1q and 11q (8/22). No LOH at 1q or 11q (7/22). |
| Howell et al. [41] | LOH analysis of 1q24-32 (HPT-JT) | 60, mixed – adenoma, hyperplasia and carcinoma | LOH was detected in six samples: one sporadic carcinoma, one HPT-JT tumor, two FIHP tumors and two sporadic adenomas. |
| Carling et al. [11]. | 9 PMSM at chr.1p (*RIZ1*) | 1, nonfamilial | LOH of *RIZ1* |
| Cetani et al. [28] | PMSM at the *Rb1* and *BRCA2* loci from each patient's paired tumor and leucocyte DNA samples. | 10 samples | 6 carcinomas had LOH for at least one marker at the *Rb1* locus. LOH for the *BRCA2* microsatellite in 3/5 informative primary tumor samples. |
| Hunt et al. [7] | 22 markers on tumor suppressor genes | 5 | LOH was found in all specimens: *p21* (4/5), *HPRT* (4/5), *VHL* (2/5), *APC* (3/5), *MET* (1/5), *P16* (4/5), *PTEN* (5/5), *RB* (2/5), *KAI1* (1/5), *HRAS* (4/5), *P53* (3/5), *NM-23* (2/5) and *NF2* (3/5). |
| Cetani et al. [36] | PMSM at *HPRT2* | 11 | Of 2 *HPRT2*-wildtype tumors, one had LOH at *HPRT2.*  Of 3 germline *HPRT2*-mutant tumors, one showed LOH at *HPRT2.*  Of 6 somatic *HPRT2*-mutant tumors, five had LOH at *HPRT2.* |
| Yip et al. [29] | 20 MSM on 12 tumor suppressor gene loci | 16 | LOH on 1p35.2-36.2 (n=8), *HPRT2* and *PTEN* (n=7 each), *HRAS* and *MEN1* (n=6 each), *RB* and *P53* (n=4 each), *VHL*, *APC*, *P16*, *KAI1* and *NF2* (n=3 each). |
| Sulaiman et al. [32] | a-CGH and SNP microarrays | 3, with *CDC73* inactivating mutations | Gross losses of chr. 1p and 13 were associated (p = 0.012) with parathyroid carcinomas as opposed to adenomas. Losses of chromosome 1p, 13, 14, 18 and gains of 1q, 5, 5q, 9, 10, 20, 22.  None of the carcinomas exhibited loss on chr. 11. No losses spanning the *CDC73*. |
| Costa-Guda et al. [42] | SNP arrays and CGH | 16 from 10 patients, 3 with germline *HPRT2* mutation. | SNP analysis (9 patients) - gains detected once (chr. 3, 11, 11p, 11q, 12, 12p), twice (chr. 5 and 21), three (chr. 1q, 20) and five times (chr.16). Losses detected once (chr. 2, 2q, 4, 8, 8p, 9, 9p, 10, 11, 13q, 14q, 17, 21, 21q, 16p, 16q, 18q), twice (chr. 6, 12, 14 and 15) three (chr. 1p and 18), four (chr.3 and five times (chr.13). cnLOH detected on chr. 3, 1p, 22, 4, and 14.  CGH: gains detected once (chr. 5, 5q, 8, 12, 12p, 22), twice (chr. 16, 16p, 20, X) and three times (chr.1). Losses detected once (2q, 6, 12, 12p, 13, 14, 15q, 18, 21), twice (chr. 1p) three (chr. 13q) and four times (chr. 3). Recurrent tumors had partly different pattern than primaries. One of the tumors has shown no alterations in CGH while SNP array was positive. Results of SNP array and CGH were variable. |
| Pandya et al. [43] | WES | 17 | Recurrent loss of chr.1p (n=8), 3 (n=3), and 13 (n=10) and recurrent gain of chr. 1q (n=6), 16 (n=9), and 20 (n=9). Focal recurrent gains 6p11.2, 7q22.1, 10q26.2 and 11q23.2 and losses 1p36.32, 3q29, 6q25.3 and 7p21.3. Detected gain of *CCND1* (n=5), 4 of the 5 cases with no *CDC73* mutation. |
| Cuiffi et al. [44] | Sanger sequencing of *CDC73* | 1 | No CDC73 LOH was found in PC tissue, nor any differences in expression levels for CDC73 gene, miR-155 and miR-664 between PC and parathyroid adenoma control tissues. |
| Jha et al. [38] | WES and Sanger sequencing, LOH on FLCN and TP53 | 17, no germline *CDC73* or *MEN1* mutations | LOH on *FLCN* in 2 of the 3 patients with germline heterozygous FLCN variants. LOH *TP53* in metastases of one patient. |
| Jentus et al. [45] | Genome-wide SNP array and broad somatic mutation analysis (NGS) | 2, *CDC73* wildtype | Near-haploid genome due to massive chromosomal losses in both tumors with LOH of chr. 1, 2, 3, 8, 10, 11, 12, 13, 15, 17, 18, and 22. Detected differences in the two cases were additional loss of chr. 6 and 9, and somatic *MEN1* mutation in one tumor. Another tumor showed loss of chr. 4 and 21, and no *MEN1* mutations were detected. |
| APT atypical parathyroid tumor, chr. chromosome(s), CGH comparative genome hybridization, FISH fluorescence in situ hybridization, LOH loss of heterozygosity, MLPA multiplex ligation-dependent probe amplification, PA parathyroid adenoma, PC parathyroid carcinoma, PMSM polymorphic microsatellite marker, SNP single nucleotide polymorphism, TMA tissue microarray, WES whole exome sequencing | | | |

**REFERENCES**

1. Farnebo F, Farnebo LO, Nordenström J, Larsson C (1997) Allelic loss on chromosome 11 is uncommon in parathyroid glands of patients with hypercalcaemic secondary hyperparathyroidism. Eur J Surg 163(5):331-337.

2. Chudek J, Ritz E, Kovacs G (1998) Genetic abnormalities in parathyroid nodules of uremic patients. Clin Cancer Res 4(1):211-214.

3. Koshiishi N, Chong JM, Fukasawa T, Ikeno R, Tanaka A, Kanazawa K, Ogura M, Ebuchi M, Takizawa T, Funata N, Fukayama M (1999) Microsatellite instability and loss of heterozygosity in primary and secondary proliferative lesions of the parathyroid gland. Lab Invest 79(9):1051-1058.

4. Nagy A, Chudek J, Kovacs G (2001) Accumulation of Allelic Changes at Chromosomes 7p, 18q, and 2 in Parathyroid Lesions of Uremic Patients. Lab Invest 81(4):527-533.

<https://doi.org/10.1038/labinvest.3780261>

5. Imanishi Y, Tahara H, Palanisamy N, Spitalny S, Salusky IB, Goodman W, Brandi ML, Drüeke TB, Sarfati E, Ureña P, Chaganti RS, Arnold A (2002) Clonal chromosomal defects in the molecular pathogenesis of refractory hyperparathyroidism of uremia. J Am Soc Nephrol 13(6):1490-1498.

<https://doi.org/10.1097/01.asn.0000018148.50109.c0>

6. Afonso S, Cigudosa JC, Santamaría I, Otero A, Menárguez J, García Miranda JL (2003) Chromosome abnormalities in hyperparathyroidism: utility of comparative genomic hybridization in the study of parathyroid hyperplasias. Nefrologia 23 Suppl 2:2-6.

7. Hunt JL, Carty SE, Yim JH, Murphy J, Barnes L (2005) Allelic loss in parathyroid neoplasia can help characterize malignancy. Am J Surg Pathol 29(8):1049-1055.

8. Yi Y, Nowak NJ, Pacchia AL, Morrison C (2008) Chromosome 11 genomic changes in parathyroid adenoma and hyperplasia: array CGH, FISH, and tissue microarrays. Genes Chromosomes Cancer 47(8):639-648.

<https://doi.org/10.1002/gcc.20565>

9. Dwight T, Kytölä S, Teh BT, Theodosopoulos G, Richardson AL, Philips J, Twigg S, Delbridge L, Marsh DJ, Nelson AE, Larsson C, Robinson BG (2002) Genetic analysis of lithium-associated parathyroid tumors. Eur J Endocrinol 146(5):619-627.

<https://doi.org/10.1530/eje.0.1460619>

10. Szabo E, Carling T, Hessman O, Rastad J (2002) Loss of heterozygosity in parathyroid glands of familial hypercalcemia with hypercalciuria and point mutation in calcium receptor. J Clin Endocrinol Metab 87(8):3961-3965.

<https://doi.org/10.1210/jcem.87.8.8759>

11. Carling T, Du Y, Fang W, Correa P, Huang S (2003) Intragenic allelic loss and promoter hypermethylation of the RIZ1 tumor suppressor gene in parathyroid tumors and pheochromocytomas. Surgery 134(6):932-939; discussion 939-940.

<https://doi.org/10.1016/s0039-6060(03)00422-7>

12. Falchetti A, Morelli A, Amorosi A, Tonelli F, Fabiani S, Martineti V, Castello R, Furlani L, Brandi ML (1997) Allelic loss in parathyroid tumors from individuals homozygous for multiple endocrine neoplasia type 1. J Clin Endocrinol Metab 82(7):2278-2282.

<https://doi.org/10.1210/jcem.82.7.4042>

13. Arnold A, Kim HG (1989) Clonal loss of one chromosome 11 in a parathyroid adenoma. J Clin Endocrinol Metab 69(3):496-499.

<https://doi.org/10.1210/jcem-69-3-496>

14. Thompson DB, Samowitz WS, Odelberg S, Davis RK, Szabo J, Heath H, 3rd (1995) Genetic abnormalities in sporadic parathyroid adenomas: loss of heterozygosity for chromosome 3q markers flanking the calcium receptor locus. J Clin Endocrinol Metab 80(11):3377-3380.

<https://doi.org/10.1210/jcem.80.11.7593455>

15. Pearce SH, Trump D, Wooding C, Sheppard MN, Clayton RN, Thakker RV (1996) Loss of heterozygosity studies at the retinoblastoma and breast cancer susceptibility (BRCA2) loci in pituitary, parathyroid, pancreatic and carcinoid tumours. Clin Endocrinol (Oxf) 45(2):195-200.

<https://doi.org/10.1046/j.1365-2265.1996.d01-1561.x>

16. Tahara H, Smith AP, Gas RD, Cryns VL, Arnold A (1996) Genomic localization of novel candidate tumor suppressor gene loci in human parathyroid adenomas. Cancer Res 56(3):599-605.

17. Agarwal SK, Schröck E, Kester MB, Burns AL, Heffess CS, Ried T, Marx SJ (1998) Comparative genomic hybridization analysis of human parathyroid tumors. Cancer Genet Cytogenet 106(1):30-36.

<https://doi.org/10.1016/s0165-4608(98)00049-1>

18. Palanisamy N, Imanishi Y, Rao PH, Tahara H, Chaganti RS, Arnold A (1998) Novel chromosomal abnormalities identified by comparative genomic hybridization in parathyroid adenomas. J Clin Endocrinol Metab 83(5):1766-1770.

<https://doi.org/10.1210/jcem.83.5.4806>

19. Farnebo F, Kytölä S, Teh BT, Dwight T, Wong FK, Höög A, Elvius M, Wassif WS, Thompson NW, Farnebo LO, Sandelin K, Larsson C (1999) Alternative genetic pathways in parathyroid tumorigenesis. J Clin Endocrinol Metab 84(10):3775-3780.

<https://doi.org/10.1210/jcem.84.10.6057>

20. Dwight T, Twigg S, Delbridge L, Wong FK, Farnebo F, Richardson AL, Nelson A, Zedenius J, Philips J, Larsson C, Teh BT, Robinson B (2000) Loss of heterozygosity in sporadic parathyroid tumours: involvement of chromosome 1 and the MEN1 gene locus in 11q13. Clin Endocrinol (Oxf) 53(1):85-92.

<https://doi.org/10.1046/j.1365-2265.2000.01010.x>

21. Haven CJ, Wong FK, van Dam EW, van der Juijt R, van Asperen C, Jansen J, Rosenberg C, de Wit M, Roijers J, Hoppener J, Lips CJ, Larsson C, Teh BT, Morreau H (2000) A genotypic and histopathological study of a large Dutch kindred with hyperparathyroidism-jaw tumor syndrome. J Clin Endocrinol Metab 85(4):1449-1454.

<https://doi.org/10.1210/jcem.85.4.6518>

22. Shan L, Yang Q, Nakamura Y, Nakamura M, Miyauchi A, Tsujimoto M, Nakatani Y, Wakasa K, Mori I, Kakudo K (2001) Frequent loss of heterozygosity at 1p36.3 and p73 abnormality in parathyroid adenomas. Mod Pathol 14(4):273-278.

<https://doi.org/10.1038/modpathol.3880302>

23. Välimäki S, Forsberg L, Farnebo LO, Larsson C (2002) Distinct target regions for chromosome 1p deletions in parathyroid adenomas and carcinomas. Int J Oncol 21(4):727-735.

<https://doi.org/10.3892/ijo.21.4.727>

24. Villablanca A, Farnebo F, Teh BT, Farnebo LO, Höög A, Larsson C (2002) Genetic and clinical characterization of sporadic cystic parathyroid tumours. Clin Endocrinol (Oxf) 56(2):261-269.

<https://doi.org/10.1046/j.0300-0664.2001.01469.x>

25. Dwight T, Nelson AE, Theodosopoulos G, Richardson AL, Learoyd DL, Philips J, Delbridge L, Zedenius J, Teh BT, Larsson C, Marsh DJ, Robinson BG (2002) Independent genetic events associated with the development of multiple parathyroid tumors in patients with primary hyperparathyroidism. Am J Pathol 161(4):1299-1306.

<https://doi.org/10.1016/s0002-9440(10)64406-9>

26. Garcia JL, Tardio JC, Gutierrez NC, Gonzalez MB, Polo JR, Hernandez JM, Menarguez J (2002) Chromosomal imbalances identified by comparative genomic hybridization in sporadic parathyroid adenomas. Eur J Endocrinol 146(2):209-213.

<https://doi.org/10.1530/eje.0.1460209>

27. Shattuck TM, Costa J, Bernstein M, Jensen RT, Chung DC, Arnold A (2002) Mutational analysis of Smad3, a candidate tumor suppressor implicated in TGF-beta and menin pathways, in parathyroid adenomas and enteropancreatic endocrine tumors. J Clin Endocrinol Metab 87(8):3911-3914.

<https://doi.org/10.1210/jcem.87.8.8707>

28. Cetani F, Pardi E, Viacava P, Pollina GD, Fanelli G, Picone A, Borsari S, Gazzerro E, Miccoli P, Berti P, Pinchera A, Marcocci C (2004) A reappraisal of the Rb1 gene abnormalities in the diagnosis of parathyroid cancer. Clin Endocrinol (Oxf) 60(1):99-106.

<https://doi.org/10.1111/j.1365-2265.2004.01954.x>

29. Yip L, Seethala RR, Nikiforova MN, Nikiforov YE, Ogilvie JB, Carty SE, Yim JH (2008) Loss of heterozygosity of selected tumor suppressor genes in parathyroid carcinoma. Surgery 144(6):949-955; discussion 954-945.

<https://doi.org/10.1016/j.surg.2008.08.030>

30. Newey PJ, Nesbit MA, Rimmer AJ, Attar M, Head RT, Christie PT, Gorvin CM, Stechman M, Gregory L, Mihai R, Sadler G, McVean G, Buck D, Thakker RV (2012) Whole-exome sequencing studies of nonhereditary (sporadic) parathyroid adenomas. J Clin Endocrinol Metab 97(10):E1995-2005.

<https://doi.org/10.1210/jc.2012-2303>

31. Cromer MK, Starker LF, Choi M, Udelsman R, Nelson-Williams C, Lifton RP, Carling T (2012) Identification of somatic mutations in parathyroid tumors using whole-exome sequencing. J Clin Endocrinol Metab 97(9):E1774-1781.

<https://doi.org/10.1210/jc.2012-1743>

32. Sulaiman L, Haglund F, Hashemi J, Obara T, Nordenström J, Larsson C, Juhlin CC (2012) Genome-wide and locus specific alterations in CDC73/HRPT2-mutated parathyroid tumors. PLoS One 7(9):e46325.

<https://doi.org/10.1371/journal.pone.0046325>

33. Pardi E, Marcocci C, Borsari S, Saponaro F, Torregrossa L, Tancredi M, Raspini B, Basolo F, Cetani F (2013) Aryl Hydrocarbon Receptor Interacting Protein (AIP) Mutations Occur Rarely in Sporadic Parathyroid Adenomas. J Clin Endocrinol Metab 98(7):2800-2810.

<https://doi.org/10.1210/jc.2012-4029>

34. Borsari S, Pardi E, Pellegata NS, Lee M, Saponaro F, Torregrossa L, Basolo F, Paltrinieri E, Zatelli MC, Materazzi G, Miccoli P, Marcocci C, Cetani F (2017) Loss of p27 expression is associated with MEN1 gene mutations in sporadic parathyroid adenomas. Endocrine 55(2):386-397.

<https://doi.org/10.1007/s12020-016-0941-6>

35. Brewer K, Nip I, Bellizzi J, Costa-Guda J, Arnold A (2021) Molecular analysis of cyclin D1 modulators PRKN and FBX4 as candidate tumor suppressors in sporadic parathyroid adenomas. Endocr Connect 10(3):302-308.

<https://doi.org/10.1530/ec-21-0055>

36. Cetani F, Ambrogini E, Viacava P, Pardi E, Fanelli G, Naccarato AG, Borsari S, Lemmi M, Berti P, Miccoli P, Pinchera A, Marcocci C (2007) Should parafibromin staining replace HRTP2 gene analysis as an additional tool for histologic diagnosis of parathyroid carcinoma? Eur J Endocrinol 156(5):547-554.

<https://doi.org/10.1530/eje-06-0720>

37. McCoy KL, Seethala RR, Armstrong MJ, Nikiforova MN, Stang MT, Carty SE, Yip L (2015) The clinical importance of parathyroid atypia: is long-term surveillance necessary? Surgery 158(4):929-935; discussion 935-926.

<https://doi.org/10.1016/j.surg.2015.06.022>

38. Jha S, Welch J, Tora R, Lack J, Warner A, Del Rivero J, Sadowski SM, Nilubol N, Schmidt LS, Linehan WM, Weinstein LS, Simonds WF, Agarwal SK (2023) Germline- and Somatic-Inactivating FLCN Variants in Parathyroid Cancer and Atypical Parathyroid Tumors. J Clin Endocrinol Metab 108(10):2686-2698.

<https://doi.org/10.1210/clinem/dgad136>

39. Kytölä S, Farnebo F, Obara T, Isola J, Grimelius L, Farnebo LO, Sandelin K, Larsson C (2000) Patterns of chromosomal imbalances in parathyroid carcinomas. Am J Pathol 157(2):579-586.

<https://doi.org/10.1016/s0002-9440(10)64568-3>

40. Haven CJ, van Puijenbroek M, Karperien M, Fleuren GJ, Morreau H (2004) Differential expression of the calcium sensing receptor and combined loss of chromosomes 1q and 11q in parathyroid carcinoma. J Pathol 202(1):86-94.

<https://doi.org/10.1002/path.1489>

41. Howell VM, Haven CJ, Kahnoski K, Khoo SK, Petillo D, Chen J, Fleuren GJ, Robinson BG, Delbridge LW, Philips J, Nelson AE, Krause U, Hammje K, Dralle H, Hoang-Vu C, Gimm O, Marsh DJ, Morreau H, Teh BT (2003) HRPT2 mutations are associated with malignancy in sporadic parathyroid tumours. J Med Genet 40(9):657-663.

<https://doi.org/10.1136/jmg.40.9.657>

42. Costa-Guda J, Imanishi Y, Palanisamy N, Kawamata N, Phillip Koeffler H, Chaganti RS, Arnold A (2013) Allelic imbalance in sporadic parathyroid carcinoma and evidence for its de novo origins. Endocrine 44(2):489-495.

<https://doi.org/10.1007/s12020-013-9903-4>

43. Pandya C, Uzilov AV, Bellizzi J, Lau CY, Moe AS, Strahl M, Hamou W, Newman LC, Fink MY, Antipin Y, Yu W, Stevenson M, Cavaco BM, Teh BT, Thakker RV, Morreau H, Schadt EE, Sebra R, Li SD, Arnold A, Chen R (2017) Genomic profiling reveals mutational landscape in parathyroid carcinomas. JCI Insight 2(6):e92061.

<https://doi.org/10.1172/jci.insight.92061>

44. Ciuffi S, Cianferotti L, Nesi G, Luzi E, Marini F, Giusti F, Zonefrati R, Gronchi G, Perigli G, Brandi ML (2019) Characterization of a novel CDC73 gene mutation in a hyperparathyrodism-jaw tumor patient affected by parathyroid carcinoma in the absence of somatic loss of heterozygosity. Endocr J 66(4):319-327.

<https://doi.org/10.1507/endocrj.EJ18-0387>

45. Jentus MM, Corver WE, Snel M, van Haalen FM, van Wezel T, Ruano D, Kapiteijn E, Crobach S, Appelman-Dijkstra NM, Schepers A, Morreau H (2025) Diagnosing the silent: the molecular landscape of non-functional parathyroid carcinoma. Virchows Arch.

<https://doi.org/10.1007/s00428-025-04193-4>
