# Supplementary material for: Genome Near-Haploidization in CDC73-Wildtype Parathyroid Tumors
Source: Research Square preprint supplement (doi:10.21203/rs.3.rs-7834367/v1), 2025-10-20
Supplement: Supplementary file 2 [file d098bc3719804946da82f438.xlsx]

## Sheet: CLIN-PATH data
Study Number	PTH preoperative (Serum, pmol/L)	Calcium preoperative (Serum, mmol/L )	Age	Sex	Histological type	Diagnosis	Diameter (cm)
1			65	m	Chief cell	APT	1.8
2	16.6	2.89	71	m	Oncocytic	PA	1.5
3			50	m	Chief cell	APT	2
4			64	f	Chief cell	PC	14
5	17.4	2.67	68	m	Oncocytic	PA	2
6	18.8	2.95	78	m	Oncocytic	PA	1.3
7	11.5	2.85	58	f	Oncocytic	PA	1.1
8	not available	2.82	67	m	Oncocytic	PA	1.3
9	20.1	2.52	56	f	Oncocytic	PA	1.5
10			72	m	Oncocytic	APT	2
11	29.4	2.77	38	f	Chief cell	PA	1.4
12	44	2.67	61	f	Oncocytic	PA	2.4
13	31.3	2.92	56	m	Oncocytic	PA	1.9
14	17.9	2.65	66	f	Oncocytic	PA	1.4
15	70	3.15	54	m	Oncocytic	PA	1.6
16	6.88	2.68	61	f	Oncocytic	PA	1.7
17	41.9	3.22	74	m	Oncocytic	PA	1.7
18	not available	2.87	43	f	Oncocytic	PA	1.7
19			51	f	Chief cell	PC	4
20			60	f	Transitional	PC	2.4
21			74	f	Oncocytic	PC	2.3
